# Supplementary material for: β spectrin-dependent and domain specific mechanisms for Na+ channel clustering
Source: eLife. 2020 May 19;9:e56629. doi: 10.7554/eLife.56629 (PMC7237202; doi:10.7554/eLife.56629)
Supplement: Figure 1—source data 1. [file elife-56629-fig1-data1.xlsx]

## Sheet: Fig.1A
	Genotype			Figure 1 A. Accelerating rotorod test
Rotarod test	Sptbn4F/F	Nes-cre; Sptbn4F/F
Latency to fall (s)	229.7	87.3
	138.3	135
	211	135
	215.3	146
	267.3	102.3
	154.7	81
	199.67	147.33
	153
N (Animal tested)	8	7
Mean	196	119
Std. Deviation	44.3	28.2
Std. Error of Mean	15.6	10.7
Unpaired t test
P value	0.0017
P value summary	**
Significantly different? (P < 0.05)	Yes
One- or two-tailed P value?	Two-tailed
t, df	t=3.945 df=13

## Sheet: Fig.1C
	Genotype					Genotype
	Sptbn4F/F	Nes-cre; Sptbn4F/F				Sptbn4F/F	Nes-cre; Sptbn4F/F		Fig. 1C. Normalized fluorescence intensity of AnkG and PanNav channel at AIS
Normalized AnkG intensity	1.09873	0.461783			Normalized PanNav intensity	0.84561	0.714145
	1.0613	0.176385				1.00735	0.59711
	0.839966	0.479745				1.14704	0.390064
N (Animal used)	3	3			N (Animal used)	3	3
Total AIS quantified	69	70			Total AIS quantified	52	51
Mean	1	0.373			Mean	1	0.567
Std. Deviation	0.14	0.17			Std. Deviation	0.151	0.164
Std. Error of Mean	0.0807	0.0983			Std. Error of Mean	0.0871	0.0947
Unpaired t test					Unpaired t test
P value	0.0079				P value	0.0282
P value summary	**				P value summary	*
Significantly different? (P < 0.05)	Yes				Significantly different? (P < 0.05)	Yes
One- or two-tailed P value?	Two-tailed				One- or two-tailed P value?	Two-tailed
t, df	t=4.933 df=4				t, df	t=3.364 df=4

## Sheet: Fig.1D
	Sptbn4F/F		Nes-cre; Sptbn4F/F
	Distance (nm)	Intensity	Distance (nm)	Intensity
	0	1668	0	43219.9		Fig. 1D Intensity measurements for STED images of AnkG at cortical AIS from 3 month-old Sptbn4F/F and Nes-cre;Sptbn4F/F mice.
	24.142	2065	13.3	42983.2
	48.284	2394.11	26.599	42888.2
	72.426	2467.46	39.899	42031.7
	96.568	2209.82	53.199	39872.4
	120.71	1794.42	66.499	36284.4
	144.852	1482.51	79.798	33230.2
	168.994	1314.67	93.098	31376.3
	193.136	1333.97	106.398	31142.3
	217.278	1547.02	119.697	32499.7
	241.42	1739.96	132.997	34900.9
	265.562	1805.9	146.297	37426.5
	289.704	1791.48	159.597	38779.6
	313.846	1636.56	172.896	38456.4
	337.988	1517.91	186.196	36402.8
	362.13	1530.51	199.496	33262
	386.272	1617.55	212.795	30109.6
	410.414	1613.03	226.095	27846
	434.557	1414.76	239.395	27108
	458.699	1218.26	252.695	27721.7
	482.841	1117.18	265.994	29070
	506.983	1195.92	279.294	30614.1
	531.125	1361.23	292.594	32147.3
	555.267	1627.39	305.893	33502
	579.409	1897.68	319.193	34758.3
	603.551	1866.63	332.493	36395.2
	627.693	1577.31	345.793	36905.9
	651.835	1302.63	359.092	35428.1
	675.977	1211.25	372.392	32429.7
	700.119	1239.74	385.692	28822.3
	724.261	1335.08	398.991	25517.4
	748.403	1538.67	412.291	23541.7
	772.545	1789.28	425.591	23015.3
	796.687	1728.57	438.89	23688.3
	820.829	1439.94	452.19	25737.2
			465.49	28646.1
			478.79	32326
			492.089	36711.5
			505.389	40726.6
			518.689	43895.2
			531.989	44321
			545.288	42669.3
			558.588	39884.1
			571.888	36321.1

## Sheet: Fig. 1E
		Genotype
		Sptbn4F/F	Nes-cre; Sptbn4F/F
	AnkG spacing (nm)	196.714	187.675	Fig. 1E. Measurements of cortical AIS AnkG spacing by STED imaging from 3 month-old Sptbn4F/F and Nes-cre;Sptbn4F/F mice.
		190.449	184.214
	N (Animal used)	2	2
	Total spacing measured	107	96
	Mean	194	186
	Std. Deviation	4.43	2.45
	Std. Error of Mean	3.13	1.73
