# Supplementary material for: β spectrin-dependent and domain specific mechanisms for Na+ channel clustering
Source: eLife. 2020 May 19;9:e56629. doi: 10.7554/eLife.56629 (PMC7237202; doi:10.7554/eLife.56629)
Supplement: Figure 2—figure supplement 1—source data 1. [file elife-56629-fig2-figsupp1-data1.xlsx]

## Sheet: Fig 2S1A
	Genotype
Rotarod test	SptbF/F	Nes-cre; SptbF/F
Latency to fall (s)	109	240
	100.3	248.7
	131.7	173.7
	146.7	261.3		Fig. 2 supplement 1A. Accelerating rotarod test performed on 3 month-old SptbF/F and Nes-cre;SptbF/F mice.
	173.3	300
	197	139
	159.3	119.7
	144.3	145
	124.7
N (Animal tested)	9	8
Mean	143	203
Std. Deviation	30.7	67.1
Std. Error of Mean	10.2	23.7
Unpaired t test
P value	0.0276
P value summary	*
Significantly different? (P < 0.05)	Yes
One- or two-tailed P value?	Two-tailed
t, df	t=2.439 df=15

## Sheet: Fig.2S1C
Genotype/Neuron types
	PV (-) neurons			PV (+) neurons
	SptbF/F	Nes-cre; SptbF/F		SptbF/F	Nes-cre; SptbF/F
Normalized intensity of AnkG	0.756483	1.20155	Normalized intensity of AnkG	0.769549	0.902714
	1.10871	1.1805		0.985869	1.30192
	1.13481	1.36278		1.24458	1.50565
N (Animal tested)	3	3	N (Animal tested)	3	3
Total AIS measured	44	44	Total AIS measured	43	44
Mean	1	1.25	Mean	1	1.24
Std. Deviation	0.211	0.0997	Std. Deviation	0.238	0.307
Std. Error of Mean	0.122	0.0576	Std. Error of Mean	0.137	0.177
Unpaired t test			Unpaired t test
P value	0.1395		P value	0.3505
P value summary	ns		P value summary	ns
Significantly different? (P < 0.05)	No		Significantly different? (P < 0.05)	No
One- or two-tailed P value?	Two-tailed		One- or two-tailed P value?	Two-tailed
t, df	t=1.841 df=4		t, df	t=1.056 df=4
				Fig. 2 supplement 1C. Normalized fluorescence intensity of AnkG at AIS in PV-positive (PV+) and negative (PV-) neurons were measured from cortical brain sections of 3 month-old SptbF/F and Nes-cre;SptbF/F mice.

## Sheet: Fig.2S1D
Genotype/Neuron types
	PV (-) neurons			PV (+) neurons
	SptbF/F	Nes-cre; SptbF/F		SptbF/F	Nes-cre; SptbF/F
Normalized intensity of pan Nav channel	0.902423	0.792004	Normalized intensity of pan Nav channel	0.882223	0.659904
	1.14543	0.965977		1.01662	0.956041
	0.952148	0.892341		1.10116	0.860098
N (Animal tested)	3	3	N (Animal tested)	3	3
Total AIS measured	44	44	Total AIS measured	43	44
Mean	1	0.883	Mean	1	0.825
Std. Deviation	0.128	0.0873	Std. Deviation	0.11	0.151
Std. Error of Mean	0.0741	0.0504	Std. Error of Mean	0.0638	0.0872
Unpaired t test			Unpaired t test
P value	0.1813		P value	0.1812
P value summary	ns		P value summary	ns
Significantly different? (P < 0.05)	No		Significantly different? (P < 0.05)	No
One- or two-tailed P value?	Two-tailed		One- or two-tailed P value?	Two-tailed
t, df	t=1.617 df=4		t, df	t=1.617 df=4
				Fig. 2 supplement 1D. Normalized fluorescence intensity of PanNav at AIS in PV-positive (PV+) and negative (PV-) neurons were measured from cortical brain sections of 3 month-old SptbF/F and Nes-cre;SptbF/F mice.

## Sheet: Fig.2S1F
Genotype/Neuron types
	PV (-) neurons			PV (+) neurons
	SptbF/F	Nes-cre; SptbF/F		SptbF/F	Nes-cre; SptbF/F
Normalized intensity of β4-spectrin	1.04	1.03889	Normalized intensity of β4-spectrin	1.13178	1.07797
	0.842	0.870874		0.912281	0.842244
	1.118	0.915463		0.955938	0.780975
N (Animal tested)	3	3	N (Animal tested)	3	3
Total AIS measured	59	66	Total AIS measured	57	69
Mean	1	0.942	Mean	1	0.9
Std. Deviation	0.142	0.0871	Std. Deviation	0.116	0.157
Std. Error of Mean	0.0821	0.0503	Std. Error of Mean	0.0672	0.0906
Unpaired t test			Unpaired t test
P value	0.5775		P value	0.4268
P value summary	ns		P value summary	ns
Significantly different? (P < 0.05)	No		Significantly different? (P < 0.05)	No
One- or two-tailed P value?	Two-tailed		One- or two-tailed P value?	Two-tailed
t, df	t=0.6056 df=4		t, df	t=0.8837 df=4
				Fig. 2 supplement 1F. Normalized fluorescence intensity of β4 spectrin at AIS in PV-positive (PV+) and negative (PV-) neurons measured in cortical brain sections of 3 month-old SptbF/F and Nes-cre;SptbF/F mice.
