# Supplementary material for: β spectrin-dependent and domain specific mechanisms for Na+ channel clustering
Source: eLife. 2020 May 19;9:e56629. doi: 10.7554/eLife.56629 (PMC7237202; doi:10.7554/eLife.56629)
Supplement: Figure 2—source data 1. [file elife-56629-fig2-data1.xlsx]

## Sheet: Fig 2B
	Genotype
	SptbF/F	Fig. 2B. The percentage of PV-positive neurons labeled with high β1 spectrin in 3 month-old SptbF/F mice cortex
PV cells labeled high β1-spectrin (%)	86.7
	93.6
	84.75
N (Animal tested)	3
Total PV+ neurons counted	166
Mean	88.4
Std. Deviation	4.65
Std. Error of Mean	2.68

## Sheet: Fig 2C
	Genotype		Genotype
	SptbF/F		SptbF/F
β1-spectrin (high) neurons labeled PV (%)	62.7	β1-spectrin (high) neurons labeled AnkR (%)	82.8
	67.7		67.4
	60.2		79.7
N (Animal tested)	3	N (Animal tested)	3
Total β1-spectrin (high) neurons counted	231	Total β1-spectrin (high) neurons counted	251
Mean	63.5	Mean	76.6
Std. Deviation	3.82	Std. Deviation	8.15
Std. Error of Mean	2.2	Std. Error of Mean	4.7
Fig. 2C. The percentage of high β1 spectrin signal in cortical neurons labeled with PV or AnkR in 3 month-old SptbF/F mice.

## Sheet: Fig 2E
Genotype/Neuron types
	β1-sp (low) neurons			β1-sp (high) neurons
	Sptbn4F/F	Nes-cre; Sptbn4F/F		Sptbn4F/F	Nes-cre; Sptbn4F/F
Percentage of neurons with β1-spectrin at AIS	0	4.55	Percentage of neurons with β1-spectrin at AIS	4.65	70.73
	0	4.65		5.56	70
	0	0		4.35	74.36
N (Animal tested)	3	3	N (Animal tested)	3	3
Total AIS counted	122	122	Total AIS counted	125	120
Mean	0	3.07	Mean	4.85	71.7
Std. Deviation	0	2.66	Std. Deviation	0.63	2.34
Std. Error of Mean	0	1.53	Std. Error of Mean	0.364	1.35
Unpaired t test			Unpaired t test
P value	0.1162		P value	1.13929e-06
P value summary	ns		P value summary	***
Significantly different? (P < 0.05)	No		Significantly different? (P < 0.05)	Yes
One- or two-tailed P value?	Two-tailed		One- or two-tailed P value?	Two-tailed
t, df	t=2.000 df=4		t, df	t=47.87 df=4
				Fig. 2E. The percentage of neurons with AIS β1 spectrin in β1 spectrin low and β1 spectrin high 3 month-old Sptbn4F/F and Nes-cre;Sptbn4F/F mice.

## Sheet: Fig 2F
	Genotype				Genotype
	Sptbn4F/F	Nes-cre; Sptbn4F/F			Sptbn4F/F	Nes-cre; Sptbn4F/F
Normalized AnkG intensity	1.01152	0.877443		Normalized PanNav intensity	0.92733	0.67745
	1.01477	0.28545			0.899655	0.577806
	0.97371	0.64524			1.17302	0.424976
N (Animal tested)	3	3		N (Animal tested)	3	3
Total AIS quantified	63	51		Total AIS quantified	52	50
Mean	1	0.603		Mean	1	0.56
Std. Deviation	0.0228	0.298		Std. Deviation	0.15	0.127
Std. Error of Mean	0.0132	0.172		Std. Error of Mean	0.0869	0.0734
Unpaired t test				Unpaired t test
P value	0.0829			P value	0.018
P value summary	ns			P value summary	*
Significantly different? (P < 0.05)	No			Significantly different? (P < 0.05)	Yes
One- or two-tailed P value?	Two-tailed			One- or two-tailed P value?	Two-tailed
t, df	t=2.300 df=4			t, df	t=3.868 df=4
				Fig. 2F. Normalized fluorescence intensity of AnkG and PanNav channel at AIS from β1 spectrin (high) cortical neurons measured in 3 month-old Sptbn4F/F and Nes-cre;Sptbn4F/F mice.

## Sheet: Fig 2G
	Percentage of intensity changes in Nes-cre; Sptbn4F/F
	β1-sp (low) neurons	β1-sp (high) neurons
AnkG	-62.7	-39.7
PanNav	-43.3	-44
						Fig. 2G. The average changes of percentage of fluorescence intensity of AnkG and PanNav channel in β1 spectrin low and β1 spectrin high neurons in 3 month-old Sptbn4F/F and Nes-cre;Sptbn4F/F mice.
