# Supplementary material for: β spectrin-dependent and domain specific mechanisms for Na+ channel clustering
Source: eLife. 2020 May 19;9:e56629. doi: 10.7554/eLife.56629 (PMC7237202; doi:10.7554/eLife.56629)
Supplement: Figure 3—source data 1. [file elife-56629-fig3-data1.xlsx]

## Sheet: Fig 3B
Genotype/Neuron types
	AnkR (low) neurons			AnkR (high) neurons
	Sptbn4F/F	Nes-cre; Sptbn4F/F		Sptbn4F/F	Nes-cre; Sptbn4F/F
Percentage of neurons with AnkR at AIS	4.26	0	Percentage of neurons with AnkR at AIS	7.69	5
	0	0		2.22	2.38
	0	0		2.22	4.35
N (Animal tested)	3	3	N (Animal tested)	3	3
Total AIS counted	150	127	Total AIS counted	129	128
Mean	1.42	0	Mean	4.04	3.91
Std. Deviation	2.46	0	Std. Deviation	3.16	1.36
Std. Error of Mean	1.42	0	Std. Error of Mean	1.82	0.788
Unpaired t test			Unpaired t test
P value	0.3739		P value	0.9497
P value summary	ns		P value summary	ns
Significantly different? (P < 0.05)	No		Significantly different? (P < 0.05)	No
One- or two-tailed P value?	Two-tailed		One- or two-tailed P value?	Two-tailed
t, df	t=1.000 df=4		t, df	t=0.06713 df=4
				Fig. 3B. The percentage of neurons with AnkR in the AIS in two subpopulations (AnkR low/high) of 3 month-old Sptbn4F/F and Nes-cre;Sptbn4F/F mice.

## Sheet: Fig 3E
	AnkG-270kDa-GFP	AnkR-GFP	AnkR/G chimera-GFP
AIS/Proximal dendrite GFP intensity	3.04	0.66	1.96
	2.63	0.64	2.21
	3.16248	0.713941	2.35645
N (batch of cultured neuron tested)	3	3	3
Total neuron measured	45	43	49
Mean	2.94	0.671	2.18
Std. Deviation	0.279	0.0382	0.2
Std. Error of Mean	0.161	0.0221	0.116
	AnkR		AnkR/G chimera
	vs.		vs.
	AnkG		AnkR
Unpaired t test
P value	0.0002		0.0002
P value summary	***		***
Significantly different? (P < 0.05)	Yes		Yes
One- or two-tailed P value?	Two-tailed		Two-tailed
t, df	t=13.99 df=4		t=12.77 df=4
				Fig. 3E. Quantification of the ratio of GFP signal intensity at AIS versus proximal dendrite in AnkG-270kDa-GFP, AnkR-GFP, or AnkR/G chimera-GFP transfected cultured hippocampal neurons.
