# Supplementary material for: β spectrin-dependent and domain specific mechanisms for Na+ channel clustering
Source: eLife. 2020 May 19;9:e56629. doi: 10.7554/eLife.56629 (PMC7237202; doi:10.7554/eLife.56629)
Supplement: Figure 4—source data 1. [file elife-56629-fig4-data1.xlsx]

## Sheet: Fig 4A
	Genotype
Rotarod test	SptbF/F; Sptbn4F/F	Nes-cre; SptbF/F; Sptbn4F/F
Latency to fall (s)	300	61.7
	170	29.7
	137.7	27.7
	202.7	33
	202.7	36
	260.33	27.7
	300	46
N (Animal tested)	7	7
Mean	225	37.4
Std. Deviation	63.4	12.5
Std. Error of Mean	24	4.71
Unpaired t test
P value	5.77932e-06
P value summary	***
Significantly different? (P < 0.05)	Yes
One- or two-tailed P value?	Two-tailed
t, df	t=7.669 df=12
		Fig. 4A. Accelerating rotarod test performed on 3 month-old SptbF/F; Sptbn4F/F and Nes-cre;SptbF/F; Sptbn4F/F mice

## Sheet: Fig 4C
	SptbF/F; Sptbn4F/F	Nes-cre; SptbF/F; Sptbn4F/F
Interictal-spikes/hr	17	574
	58	299
	0	792
		320
N (Animal tested)	3	4
Mean	25	496
Std. Deviation	29.8	233
Std. Error of Mean	17.2	117
Unpaired t test
P value	0.0194
P value summary	*
Significantly different? (P < 0.05)	Yes
One- or two-tailed P value?	Two-tailed
t, df	t=3.394 df=5
			Fig. 4C. Quantification of interictal-spikes/hr in SptbF/F; Sptbn4F/F and Nes-cre;SptbF/F; Sptbn4F/F mice.

## Sheet: Fig 4D
	SptbF/F; Sptbn4F/F	Nes-cre; SptbF/F; Sptbn4F/F
Seizure/hr	0	131
	0	49
	0	154
		147
N (Animal tested)	3	4
Mean	0	120
Std. Deviation	0	48.5
Std. Error of Mean	0	24.2
Unpaired t test
P value	0.0085
P value summary	**
Significantly different? (P < 0.05)	Yes
One- or two-tailed P value?	Two-tailed
t, df	t=4.194 df=5
		Fig. 4D. Quantification of seizures/hr in SptbF/F; Sptbn4F/F and Nes-cre;SptbF/F; Sptbn4F/F mice.

## Sheet: Fig. 4F
	Genotype/Neuron types								Genotype/Neuron types
		PV (-) neurons			PV (+) neurons					PV (-) neurons			PV (+) neurons
		SptbF/F; Sptbn4F/F	Nes-cre; SptbF/F; Sptbn4F/F		SptbF/F; Sptbn4F/F	Nes-cre; SptbF/F; Sptbn4F/F				SptbF/F; Sptbn4F/F	Nes-cre; SptbF/F; Sptbn4F/F		SptbF/F; Sptbn4F/F	Nes-cre; SptbF/F; Sptbn4F/F
	Normalized intensity of AnkG	0.684837	0.250162	Normalized intensity of AnkG	0.711954	0.202322			Normalized intensity of PanNav	1.01899	0.223163	Normalized intensity of PanNav	0.908755	0.392911
		1.20852	0.337625		1.33326	0.222984				0.68362	0.262927		0.835961	0.206264
		1.10664	0.39178		0.954787	0.273356				1.29739	0.337465		1.25528	0.2812
	N (Animal tested)	3	3	N (Animal tested)	3	3			N (Animal tested)	3	3	N (Animal tested)	3	3
	Total AIS measured	50	37	Total AIS measured	50	37			Total AIS measured	50	37	Total AIS measured	50	37
	Mean	1	0.327	Mean	1	0.233			Mean	1	0.275	Mean	1	0.293
	Std. Deviation	0.278	0.0715	Std. Deviation	0.313	0.0365			Std. Deviation	0.307	0.058	Std. Deviation	0.224	0.0939
	Std. Error of Mean	0.16	0.0413	Std. Error of Mean	0.181	0.0211			Std. Error of Mean	0.177	0.0335	Std. Error of Mean	0.129	0.0542
	Unpaired t test			Unpaired t test					Unpaired t test			Unpaired t test
	P value	0.0152		P value	0.0135				P value	0.0159		P value	0.0073
	P value summary	*		P value summary	*				P value summary	*		P value summary	**
	Significantly different? (P < 0.05)	Yes		Significantly different? (P < 0.05)	Yes				Significantly different? (P < 0.05)	Yes		Significantly different? (P < 0.05)	Yes
	One- or two-tailed P value?	Two-tailed		One- or two-tailed P value?	Two-tailed				One- or two-tailed P value?	Two-tailed		One- or two-tailed P value?	Two-tailed
	t, df	t=4.069 df=4		t, df	t=4.215 df=4				t, df	t=4.018 df=4		t, df	t=5.037 df=4
							Fig. 4F. Normalized fluorescence intensity for AnkG and PanNav at AIS in PV(-) and PV(+) neurons in cortex from 3 month old SptbF/F; Sptbn4F/F and Nes-cre;SptbF/F; Sptbn4F/F mice.

## Sheet: Fig 4H
Genotype/Age
	3 month-old			6 month-old
	SptbF/F; Sptbn4F/F	Nes-cre; SptbF/F; Sptbn4F/F		SptbF/F; Sptbn4F/F	Nes-cre; SptbF/F; Sptbn4F/F
Percentage of nodes labeld Nav	98.74	81.51	Percentage of nodes labeld Nav	96.43	64.63
	90.52	80		93.16	62.6
	98.04	69.49		93.97	52.43
N (Animal tested)	3	3	N (Animal tested)	3	3
Total nodes counted	377	364	Total nodes counted	345	373
Mean	95.8	77	Mean	94.5	59.9
Std. Deviation	4.56	6.55	Std. Deviation	1.7	6.54
Std. Error of Mean	2.63	3.78	Std. Error of Mean	0.983	3.77
Unpaired t test			Unpaired t test
P value	0.0152		P value	0.0009
P value summary	*		P value summary	***
Significantly different? (P < 0.05)	Yes		Significantly different? (P < 0.05)	Yes
One- or two-tailed P value?	Two-tailed		One- or two-tailed P value?	Two-tailed
t, df	t=4.075 df=4		t, df	t=8.880 df=4
				Fig. 4H. Quantification of the percentage of corpus callosum nodes labeled for Nav channels in SptbF/F; Sptbn4F/F and Nes-cre;SptbF/F; Sptbn4F/F mice.
